# Supplementary material for: Scrib:Rac1 interactions are required for the morphogenesis of the ventricular myocardium
Source: PubMed Central journal article supplement — Cardiovasc Res. 2014 Aug 18;104(1):103–15. doi: 10.1093/cvr/cvu193 (PMC4174891; doi:10.1093/cvr/cvu193), 2014-08-18
Supplement: supp_cvu193_cvu193supp.pdf [file supp_cvu193_cvu193supp.pdf]

## Online Supplement

### Supplementary Tables

**Supplementary Table 1: Heart and body weight measurements for six month *Scrib<sup>ff</sup>;Nkx2.5-Cre* and control littermates**

|                                              | <b>n</b> | <b>Body Weight (g)</b> | <b>Heart weight (g)</b> | <b>Heart weight/Body weight</b> |
|----------------------------------------------|----------|------------------------|-------------------------|---------------------------------|
| <b>Control</b>                               | 5        | 29.23 ± 1.88           | 223.92 ± 28             | 7.66 ± 1.399                    |
| <b><u>Scrib<sup>ff</sup></u>; Nkx2.5-Cre</b> | 4        | 34.09 ± 7.3            | 302.2 ± 63              | 8.63 ± 3.13                     |

## Supplementary Figures

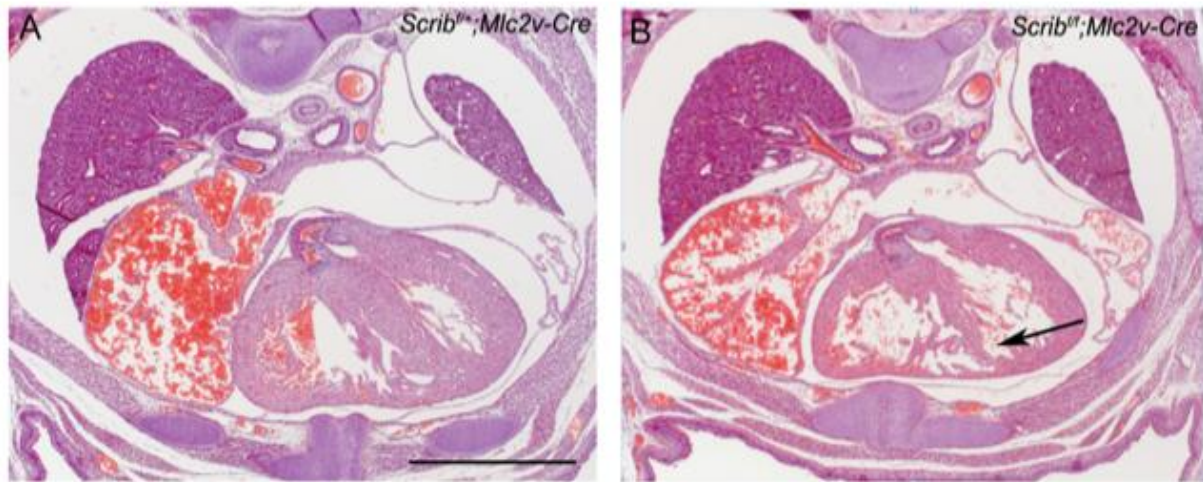

### Supplementary Figure 1

**Depletion of Scrib in late cardiomyocytes leads to thin ventricular wall.**

**(A)** H&E staining of control and **(B)** *Scrib<sup>ff</sup>;Mlc2v-Cre* mouse embryo sections at E15.5.

Note abnormalities in the ventricular septum (arrow) in Scrib depleted myocardium. Scale bar = 100 $\mu$ m.

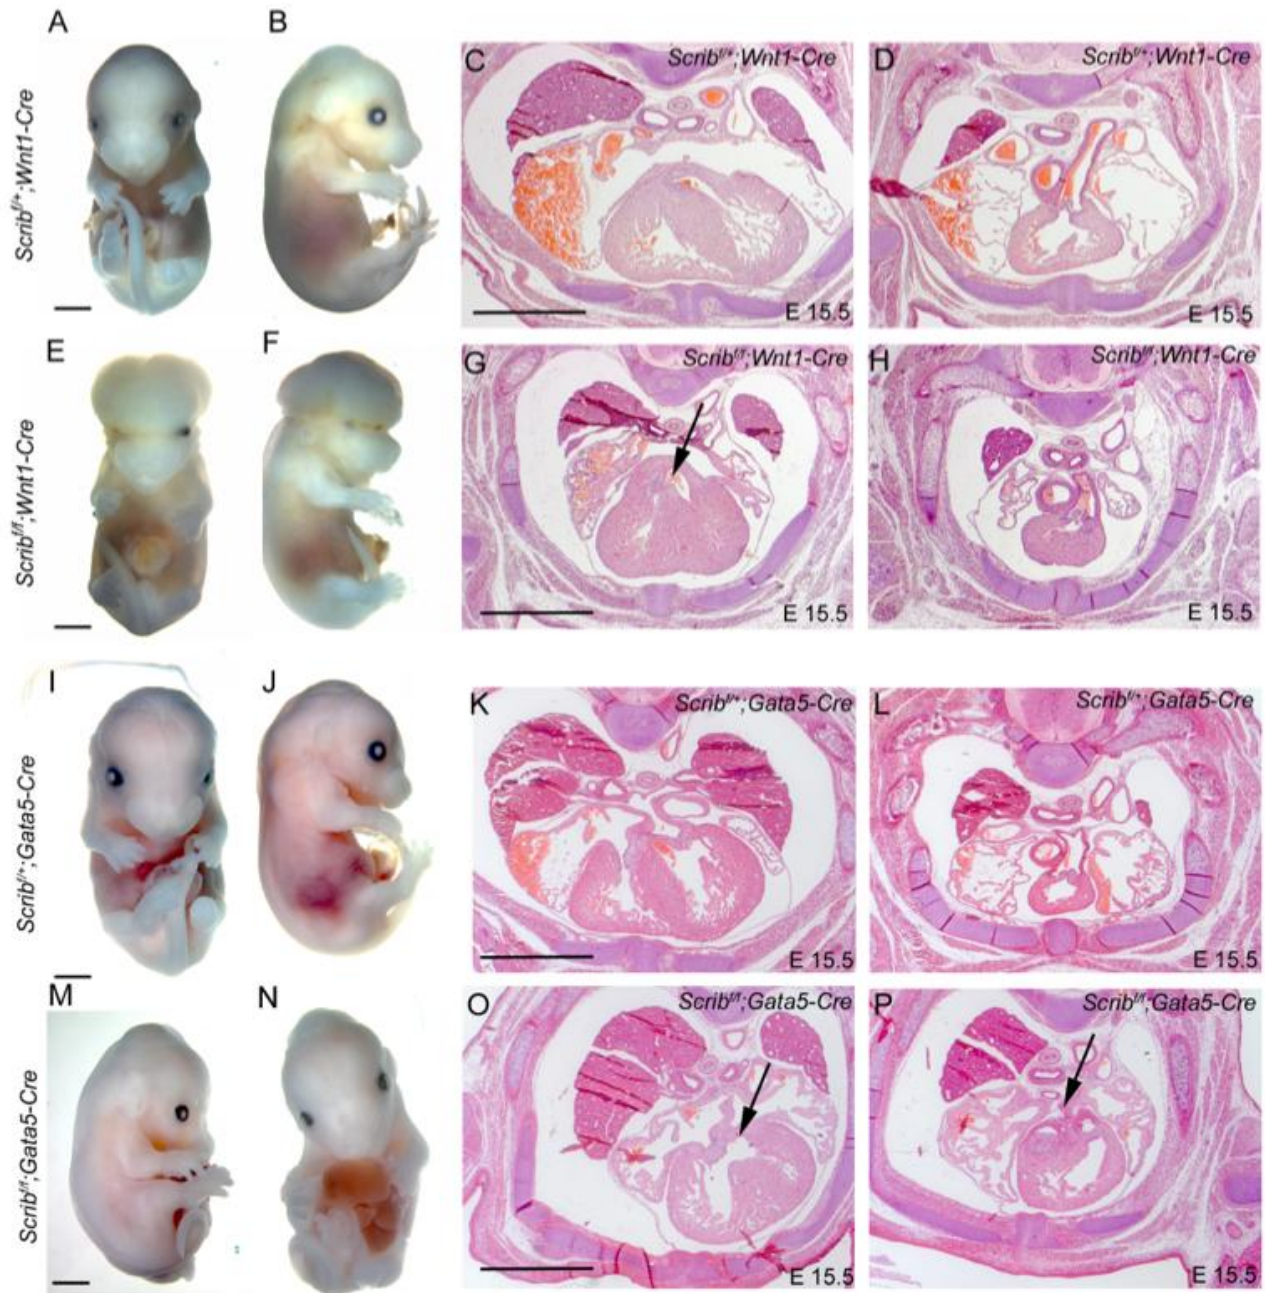

### Supplementary Figure 2

#### Cardiac malformations in *Scrib<sup>ff</sup>;**Wnt1-Cre* and *Scrib<sup>ff</sup>;**Gata5-Cre* mutants with external phenotypes.

(A,B, E,F) Representative images of control and *Scrib<sup>ff</sup>;**Wnt1-Cre* mouse with exencephaly at the age of E15.5. (C,D,G,H) Transverse sections of control and *Scrib<sup>ff</sup>;**Wnt1-Cre* embryos revealed ventricular septal defect (arrow) in the mutant embryo. (I,J,M,N) Images of control and *Scrib<sup>ff</sup>;**Gata5-Cre* embryos at E15.5. The *Scrib<sup>ff</sup>;**Gata5-Cre* mutant exhibit spinal bifida and gastroschisis.

(K,L,O,P) Analysis of the *Scrib<sup>ff</sup>;**Gata5-Cre* mutant heart sections revealed double outlet right ventricle and ventricular septal defect (arrows).

A,B,E,F,I,J,M,N: scale bar = 2mm. C,D,G,H,K,L,O,P: scale bar = 50µm.



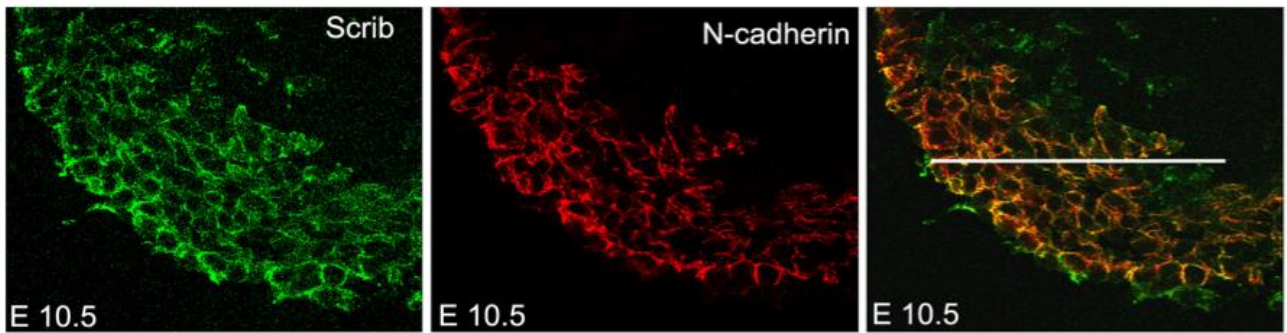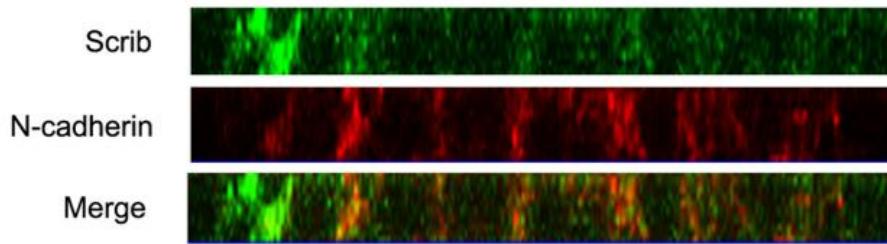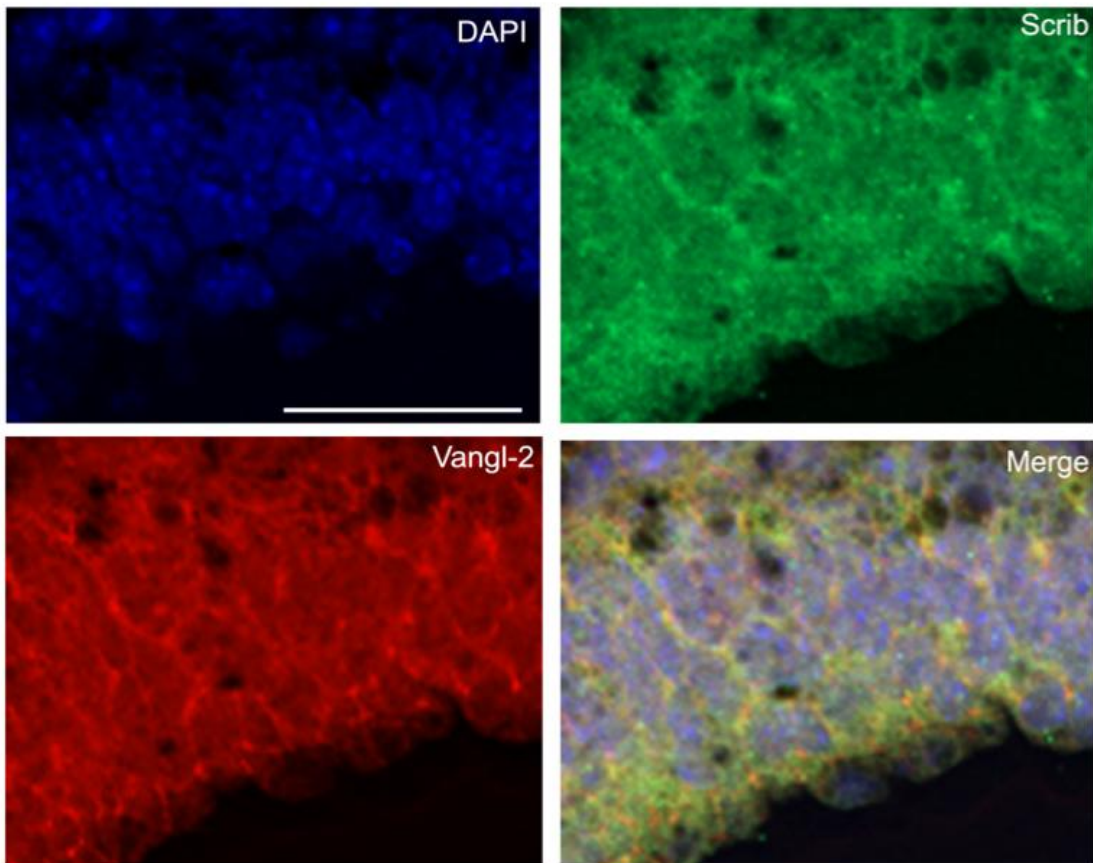

**Supplementary Figure 3**

**Colocalisation of Scrib with N-cadherin in cardiomyocytes and Vangl2 in embryonic pharyngeal endoderm.**

**(A)** Scrib co-localises with the adherens junction protein N-cadherin in E10.5 cardiomyocytes, as it did with  $\beta$ -catenin. **(B)** Scrib co-localises with the PCP protein Vangl2 at the cell membrane of epithelial cells in the pharyngeal endoderm at E10.5.
